# Supplementary material for: A Cbx8-Containing Polycomb Complex Facilitates the Transition to Gene Activation during ES Cell Differentiation
Source: PubMed Central journal article supplement (PMC4263398; doi:10.1371/journal.pgen.1004851), 2014-12-11
Supplement: pgen.1004851.s008.pdf [file pgen.1004851.s008.pdf]

| Description                                                                                                                       | ΣCoverage | Σ# Unique Peptides | Σ# Peptides      | Σ# PSMs    | Control | Flag-Cbx8 | ratio Area | Abundance relative to bait | Rank |
|-----------------------------------------------------------------------------------------------------------------------------------|-----------|--------------------|------------------|------------|---------|-----------|------------|----------------------------|------|
| Description                                                                                                                       | ΣCoverage | # Proteins         | # Unique Peptide | # Peptides | # PSMs  | A2: Area  | B2: Area   |                            |      |
| CBX8 BAIT                                                                                                                         | 50.55     | 1                  | 19               | 19         | 116     | 0.000E0   | 7.719E9    | 100                        | 100  |
| RING2                                                                                                                             | 39.58     | 2                  | 12               | 14         | 42      | 3.884E7   | 3.585E9    | 92.30                      | 46   |
| RING1                                                                                                                             | 23.15     | 1                  | 5                | 7          | 12      | 4.557E7   | 1.775E9    | 38.96                      | 23   |
| PHC2                                                                                                                              | 14.12     | 1                  | 12               | 13         | 25      | 1.000E0   | 1.331E9    | 100                        | 17   |
| PCGF2 = MEL18                                                                                                                     | 9.94      | 1                  | 2                | 5          | 6       | 1.000E0   | 1.145E9    | 100                        | 15   |
| BMI1                                                                                                                              | 8.02      | 1                  | 1                | 4          | 5       | 1.000E0   | 8.942E8    | 100                        | 9    |
| 60S ribosomal protein L10a OS=Mus musculus GN=Rpl10a PE=1 SV=3 - [RL10A_MOUSE]                                                    | 29.03     | 1                  | 7                | 7          | 10      | 5.557E7   | 7.325E8    | 13.18                      | 9    |
| Ig kappa chain V region Mem5 (Fragment) OS=Mus musculus PE=1 SV=1 - [KVM5_MOUSE]                                                  | 5.79      | 1                  | 1                | 1          | 1       | 1.000E0   | 7.226E8    | 100                        | 9    |
| ATP-dependent zinc metalloprotease YME1L1 OS=Mus musculus GN=Yme1l1 PE=2 SV=1 - [YMEL1_MOUSE]                                     | 5.73      | 1                  | 2                | 2          | 3       | 1.000E0   | 6.839E8    | 100                        | 9    |
| PHC1                                                                                                                              | 25.40     | 1                  | 13               | 13         | 20      | 1.000E0   | 6.786E8    | 100                        | 5    |
| Cysteine and glycine-rich protein 2 OS=Mus musculus GN=Csrp2 PE=1 SV=3 - [CSRP2_MOUSE]                                            | 7.77      | 1                  | 1                | 1          | 2       | 1.000E0   | 3.883E8    | 100                        | 3    |
| Serine/arginine-rich splicing factor 9 OS=Mus musculus GN=Srsf9 PE=1 SV=1 - [SRSF9_MOUSE]                                         | 16.67     | 1                  | 3                | 4          | 5       | 1.000E0   | 2.121E8    | 100                        | 2    |
| S-phase kinase-associated protein 1 OS=Mus musculus GN=Skp1 PE=1 SV=3 - [SKP1_MOUSE]                                              | 17.79     | 1                  | 1                | 1          | 7       | 8.216E6   | 1.925E8    | 23.43                      | 2    |
| Actin-related protein 2/3 complex subunit 5 OS=Mus musculus GN=Arcp5 PE=2 SV=3 - [ARPC5_MOUSE]                                    | 7.95      | 1                  | 1                | 1          | 1       | 1.000E0   | 1.637E8    | 100                        | 2    |
| PCGF1 = NSPC1                                                                                                                     | 15.44     | 1                  | 2                | 2          | 2       | 1.000E0   | 1.564E8    | 100                        | 2    |
| PCGF6 = RNF134                                                                                                                    | 24.08     | 1                  | 5                | 5          | 8       | 1.000E0   | 1.564E8    | 100                        | 2    |
| Uncharacterized protein C7orf50 homolog OS=Mus musculus PE=2 SV=3 - [CG050_MOUSE]                                                 | 12.31     | 1                  | 1                | 1          | 1       | 1.000E0   | 1.505E8    | 100                        | 2    |
| MAX gene-associated protein OS=Mus musculus GN=Mga PE=2 SV=1 - [MGAP_MOUSE]                                                       | 8.62      | 1                  | 14               | 14         | 19      | 1.000E0   | 1.480E8    | 100                        | 2    |
| Pre-mRNA branch site protein p14 OS=Mus musculus GN=Sf3b14 PE=2 SV=1 - [PM14_MOUSE]                                               | 9.60      | 1                  | 1                | 1          | 1       | 1.000E0   | 1.430E8    | 100                        | 2    |
| 60S ribosomal protein L31 OS=Mus musculus GN=Rpl31 PE=2 SV=1 - [RL31_MOUSE]                                                       | 34.40     | 1                  | 4                | 4          | 5       | 1.000E0   | 1.360E8    | 100                        | 1    |
| Ribosomal RNA-processing protein 7 homolog A OS=Mus musculus GN=Rrp7a PE=2 SV=1 - [RRP7A_MOUSE]                                   | 22.50     | 1                  | 3                | 3          | 4       | 1.000E0   | 1.322E8    | 100                        | 1    |
| 40S ribosomal protein S13 OS=Mus musculus GN=Rps13 PE=1 SV=2 - [RS13_MOUSE]                                                       | 16.56     | 1                  | 3                | 3          | 4       | 1.000E0   | 1.223E8    | 100                        | 1    |
| RuvB-like 1 OS=Mus musculus GN=Ruvb1 PE=1 SV=1 - [RUVB1_MOUSE]                                                                    | 19.74     | 1                  | 5                | 5          | 6       | 1.000E0   | 1.062E8    | 100                        | 1    |
| 40S ribosomal protein S15 OS=Mus musculus GN=Rps15 PE=2 SV=2 - [RS15_MOUSE]                                                       | 26.90     | 1                  | 2                | 2          | 2       | 1.000E0   | 9.890E7    | 100                        | 1    |
| Non-histone chromosomal protein HMG-17 OS=Mus musculus GN=Hmg17 PE=1 SV=2 - [HMGN2_MOUSE]                                         | 16.67     | 1                  | 1                | 1          | 1       | 1.000E0   | 9.543E7    | 100                        | 1    |
| U5 small nuclear ribonucleoprotein 40 kDa protein OS=Mus musculus GN=Snrnp40 PE=2 SV=1 - [SNR40_MOUSE]                            | 17.60     | 1                  | 2                | 2          | 3       | 1.000E0   | 9.475E7    | 100                        | 1    |
| DnaJ homolog subfamily A member 2 OS=Mus musculus GN=Dnaja2 PE=1 SV=1 - [DNJA2_MOUSE]                                             | 7.77      | 1                  | 1                | 1          | 2       | 1.000E0   | 9.261E7    | 100                        | 1    |
| Neuroguinidin OS=Mus musculus GN=Ngn1 PE=1 SV=1 - [NGDN_MOUSE]                                                                    | 14.92     | 1                  | 3                | 3          | 4       | 1.000E0   | 8.783E7    | 100                        | 1    |
| 40S ribosomal protein S27 OS=Mus musculus GN=Rps27 PE=1 SV=3 - [RS27_MOUSE]                                                       | 30.95     | 2                  | 2                | 2          | 2       | 1.000E0   | 8.663E7    | 100                        | 1    |
| Protein virilizer homolog OS=Mus musculus GN=Kiaa1429 PE=1 SV=1 - [VIR_MOUSE]                                                     | 5.80      | 1                  | 7                | 7          | 8       | 6.384E6   | 8.387E7    | 13.14                      | 1    |
| Polycomb group RING finger protein 5 OS=Mus musculus GN=Pcgf5 PE=2 SV=1 - [PCGF5_MOUSE]                                           | 11.33     | 1                  | 2                | 2          | 2       | 1.000E0   | 7.995E7    | 100                        | 1    |
| Splicing factor 1 OS=Mus musculus GN=Sf1 PE=1 SV=6 - [SF01_MOUSE]                                                                 | 7.81      | 1                  | 2                | 2          | 4       | 1.000E0   | 7.670E7    | 100                        | 1    |
| Translocon-associated protein subunit delta OS=Mus musculus GN=Ssr4 PE=2 SV=1 - [SSRD_MOUSE]                                      | 6.40      | 1                  | 1                | 1          | 1       | 1.000E0   | 7.639E7    | 100                        | 1    |
| Solute carrier family 2, facilitated glucose transporter member 3 OS=Mus musculus GN=Slc2a3 PE=1 SV=1 - [GTR3_MOUSE]              | 5.48      | 1                  | 2                | 2          | 2       | 1.000E0   | 7.077E7    | 100                        | 1    |
| DnaJ homolog subfamily A member 3, mitochondrial OS=Mus musculus GN=Dnaja3 PE=1 SV=1 - [DNJA3_MOUSE]                              | 9.38      | 1                  | 3                | 3          | 4       | 1.000E0   | 6.974E7    | 100                        | 1    |
| 60S ribosome subunit biogenesis protein NIP7 homolog OS=Mus musculus GN=Nip7 PE=2 SV=1 - [NIP7_MOUSE]                             | 17.22     | 1                  | 2                | 2          | 2       | 1.000E0   | 6.898E7    | 100                        | 1    |
| Mitochondrial 2-oxoglutarate/malate carrier protein OS=Mus musculus GN=Slc25a11 PE=1 SV=3 - [M2OM_MOUSE]                          | 5.10      | 1                  | 1                | 1          | 1       | 1.000E0   | 6.857E7    | 100                        | 1    |
| T-complex protein 1 subunit theta OS=Mus musculus GN=Cct8 PE=1 SV=3 - [TCPQ_MOUSE]                                                | 5.66      | 1                  | 3                | 3          | 3       | 1.000E0   | 6.168E7    | 100                        | 1    |
| Origin recognition complex subunit 3 OS=Mus musculus GN=Orc3 PE=1 SV=1 - [ORC3_MOUSE]                                             | 10.63     | 1                  | 5                | 5          | 6       | 1.000E0   | 6.038E7    | 100                        | 1    |
| Charged multivesicular body protein 4b OS=Mus musculus GN=Chmp4b PE=2 SV=2 - [CHM4B_MOUSE]                                        | 10.71     | 1                  | 2                | 2          | 2       | 1.000E0   | 5.850E7    | 100                        | 1    |
| Protein max OS=Mus musculus GN=Max PE=1 SV=1 - [MAX_MOUSE]                                                                        | 6.25      | 1                  | 1                | 1          | 1       | 1.000E0   | 5.796E7    | 100                        | 1    |
| Sequestosome-1 OS=Mus musculus GN=Sqstm1 PE=1 SV=1 - [SQSTM_MOUSE]                                                                | 5.88      | 1                  | 2                | 2          | 2       | 1.000E0   | 5.631E7    | 100                        | 0    |
| Serpin H1 OS=Mus musculus GN=Serp1h1 PE=1 SV=3 - [SERPH_MOUSE]                                                                    | 9.35      | 1                  | 3                | 3          | 3       | 1.000E0   | 5.546E7    | 100                        | 0    |
| Coiled-coil-helix-coiled-coil-helix domain-containing protein 2, mitochondrial OS=Mus musculus GN=Chcd2 PE=1 SV=1 - [CHCD2_MOUSE] | 15.69     | 1                  | 1                | 1          | 1       | 1.000E0   | 5.467E7    | 100                        | 0    |
| U2 small nuclear ribonucleoprotein A' OS=Mus musculus GN=Snrpa1 PE=1 SV=2 - [RU2A_MOUSE]                                          | 15.29     | 1                  | 2                | 2          | 2       | 1.000E0   | 5.422E7    | 100                        | 0    |
| Origin recognition complex subunit 4 OS=Mus musculus GN=Orc4 PE=1 SV=2 - [ORC4_MOUSE]                                             | 6.93      | 2                  | 2                | 2          | 2       | 1.000E0   | 5.377E7    | 100                        | 0    |
| Protein S100-A11 OS=Mus musculus GN=S100a11 PE=2 SV=1 - [S100AB_MOUSE]                                                            | 26.53     | 1                  | 2                | 2          | 2       | 1.000E0   | 5.240E7    | 100                        | 0    |
| Cleavage and polyadenylation specificity factor subunit 4 OS=Mus musculus GN=Cpsf4 PE=2 SV=1 - [CPSF4_MOUSE]                      | 14.69     | 1                  | 2                | 2          | 2       | 1.000E0   | 5.191E7    | 100                        | 0    |
| DNA-directed RNA polymerases 1, II, and III subunit RPABC4 OS=Mus musculus GN=Polr2k PE=2 SV=2 - [RPAB4_MOUSE]                    | 12.07     | 1                  | 1                | 1          | 1       | 1.000E0   | 5.187E7    | 100                        | 0    |
| T-complex protein 1 subunit eta OS=Mus musculus GN=Cct7 PE=1 SV=1 - [TCPH_MOUSE]                                                  | 8.46      | 3                  | 3                | 3          | 3       | 1.000E0   | 5.179E7    | 100                        | 0    |
| Activating signal cointegrator 1 complex subunit 2 OS=Mus musculus GN=Ascc2 PE=2 SV=1 - [ASCC2_MOUSE]                             | 5.21      | 1                  | 2                | 2          | 2       | 1.000E0   | 5.166E7    | 100                        | 0    |
| Cleavage stimulation factor subunit 2 OS=Mus musculus GN=Cstf2 PE=1 SV=2 - [CSTF2_MOUSE]                                          | 7.07      | 2                  | 2                | 2          | 2       | 1.000E0   | 5.105E7    | 100                        | 0    |
| Tubulointerstitial nephritis antigen-like OS=Mus musculus GN=Timag1 PE=1 SV=1 - [TINAL_MOUSE]                                     | 6.87      | 1                  | 3                | 3          | 3       | 1.000E0   | 5.099E7    | 100                        | 0    |
| Transcription factor E2F6 OS=Mus musculus GN=E2f6 PE=1 SV=2 - [E2F6_MOUSE]                                                        | 6.25      | 1                  | 1                | 1          | 2       | 1.000E0   | 4.839E7    | 100                        | 0    |
| Nuclear envelope pore membrane protein POM 121 OS=Mus musculus GN=Pom121 PE=1 SV=2 - [PO121_MOUSE]                                | 7.08      | 3                  | 3                | 3          | 4       | 1.000E0   | 4.803E7    | 100                        | 0    |
| Nucleoporin SEH1 OS=Mus musculus GN=Seh1 PE=2 SV=1 - [SEH1_MOUSE]                                                                 | 6.11      | 1                  | 1                | 1          | 1       | 1.000E0   | 4.713E7    | 100                        | 0    |
| Cell growth-regulating nucleolar protein OS=Mus musculus GN=Lyar PE=1 SV=2 - [LYAR_MOUSE]                                         | 5.15      | 4                  | 2                | 2          | 2       | 1.000E0   | 4.664E7    | 100                        | 0    |

|                                                                                                                   |       |   |   |   |    |         |         |       |   |
|-------------------------------------------------------------------------------------------------------------------|-------|---|---|---|----|---------|---------|-------|---|
| Chromatin complexes subunit BAP18 OS=Mus musculus GN=Bap18 PE=1 SV=1 - [BAP18_MOUSE]                              | 8.19  | 1 | 1 | 1 | 1  | 1.000E0 | 4.481E7 | 100   | 0 |
| ATP-binding cassette sub-family F member 2 OS=Mus musculus GN=Abcf2 PE=2 SV=1 - [ABCF2_MOUSE]                     | 7.96  | 1 | 4 | 4 | 4  | 1.000E0 | 4.453E7 | 100   | 0 |
| Small ubiquitin-related modifier 1 OS=Mus musculus GN=Sumo1 PE=1 SV=1 - [SUMO1_MOUSE]                             | 21.78 | 1 | 1 | 1 | 1  | 1.000E0 | 4.222E7 | 100   |   |
| PAX3- and PAX7-binding protein 1 OS=Mus musculus GN=Paxbp1 PE=1 SV=3 - [PAXB1_MOUSE]                              | 5.33  | 1 | 3 | 3 | 3  | 3.564E6 | 4.180E7 | 11.73 |   |
| Centrin-3 OS=Mus musculus GN=Cetrn3 PE=2 SV=1 - [CETN3_MOUSE]                                                     | 7.19  | 1 | 1 | 1 | 1  | 1.000E0 | 4.034E7 | 100   |   |
| Eukaryotic translation initiation factor 3 subunit F OS=Mus musculus GN=Eif3f PE=1 SV=2 - [EIF3F_MOUSE]           | 12.47 | 1 | 3 | 3 | 4  | 1.000E0 | 3.961E7 | 100   |   |
| Single-stranded DNA-binding protein, mitochondrial OS=Mus musculus GN=Ssbp1 PE=2 SV=1 - [SSBP_MOUSE]              | 5.26  | 1 | 1 | 1 | 1  | 1.000E0 | 3.842E7 | 100   |   |
| Protein LLP homolog OS=Mus musculus GN=Llph PE=2 SV=1 - [LLPH_MOUSE]                                              | 16.92 | 1 | 1 | 1 | 1  | 1.000E0 | 3.685E7 | 100   |   |
| 40S ribosomal protein S17 OS=Mus musculus GN=Rps17 PE=1 SV=2 - [RS17_MOUSE]                                       | 23.70 | 1 | 2 | 2 | 4  | 1.000E0 | 3.635E7 | 100   |   |
| 60S ribosomal protein L37a OS=Mus musculus GN=Rpl37a PE=2 SV=2 - [RL37A_MOUSE]                                    | 36.96 | 1 | 4 | 4 | 11 | 1.000E0 | 3.615E7 | 100   |   |
| Lupus La protein homolog OS=Mus musculus GN=Ssb PE=2 SV=1 - [LA_MOUSE]                                            | 9.40  | 1 | 3 | 3 | 3  | 1.000E0 | 3.556E7 | 100   |   |
| Myosin light chain 3 OS=Mus musculus GN=Myl3 PE=1 SV=4 - [MYL3_MOUSE]                                             | 14.22 | 1 | 2 | 2 | 2  | 1.000E0 | 3.497E7 | 100   |   |
| Dolichol-phosphate mannosyltransferase OS=Mus musculus GN=Dpm1 PE=2 SV=1 - [DPM1_MOUSE]                           | 6.54  | 1 | 2 | 2 | 2  | 1.000E0 | 3.463E7 | 100   |   |
| Poly(rC)-binding protein 2 OS=Mus musculus GN=Pcbp2 PE=1 SV=1 - [PCBP2_MOUSE]                                     | 14.36 | 2 | 2 | 3 | 3  | 1.000E0 | 3.441E7 | 100   |   |
| Ragulator complex protein LAMTOR1 OS=Mus musculus GN=Lamtor1 PE=1 SV=1 - [LTOR1_MOUSE]                            | 7.45  | 1 | 1 | 1 | 1  | 1.000E0 | 3.425E7 | 100   |   |
| Probable RNA-binding protein 19 OS=Mus musculus GN=Rbm19 PE=1 SV=1 - [RBM19_MOUSE]                                | 5.57  | 1 | 3 | 3 | 3  | 1.000E0 | 3.379E7 | 100   |   |
| Ribonuclease P protein subunit p25-like protein OS=Mus musculus GN=Rpp25l PE=2 SV=1 - [RP25L_MOUSE]               | 5.52  | 1 | 1 | 1 | 1  | 1.000E0 | 3.368E7 | 100   |   |
| 40S ribosomal protein S15a OS=Mus musculus GN=Rps15a PE=2 SV=2 - [RS15A_MOUSE]                                    | 6.15  | 1 | 1 | 1 | 1  | 1.000E0 | 3.323E7 | 100   |   |
| T-complex protein 1 subunit beta OS=Mus musculus GN=Cct2 PE=1 SV=4 - [TCPB_MOUSE]                                 | 13.83 | 1 | 5 | 5 | 6  | 1.000E0 | 3.301E7 | 100   |   |
| Serine/arginine-rich splicing factor 10 OS=Mus musculus GN=Srsf10 PE=1 SV=2 - [SRS10_MOUSE]                       | 8.40  | 1 | 1 | 1 | 1  | 1.000E0 | 3.281E7 | 100   |   |
| Cytochrome P450 26A1 OS=Mus musculus GN=Cyp26a1 PE=2 SV=1 - [CP26A_MOUSE]                                         | 6.04  | 1 | 2 | 2 | 2  | 1.000E0 | 3.135E7 | 100   |   |
| DNA-directed RNA polymerase II subunit RPB11 OS=Mus musculus GN=Polr2j PE=2 SV=1 - [RPB11_MOUSE]                  | 12.82 | 1 | 1 | 1 | 1  | 1.000E0 | 3.133E7 | 100   |   |
| Mitochondrial import inner membrane translocase subunit Tim23 OS=Mus musculus GN=Timm23 PE=2 SV=1 - [TIM23_MOUSE] | 8.13  | 1 | 1 | 1 | 1  | 1.000E0 | 3.108E7 | 100   |   |
| Mesoderm-specific transcript protein OS=Mus musculus GN=Mest PE=2 SV=1 - [MEST_MOUSE]                             | 11.04 | 1 | 2 | 2 | 2  | 1.000E0 | 3.079E7 | 100   |   |
| T-complex protein 1 subunit epsilon OS=Mus musculus GN=Cct5 PE=1 SV=1 - [TCPE_MOUSE]                              | 5.36  | 1 | 2 | 2 | 2  | 1.000E0 | 3.021E7 | 100   |   |
| Chromobox protein homolog 5 OS=Mus musculus GN=Cbx5 PE=1 SV=1 - [CBX5_MOUSE]                                      | 6.81  | 1 | 1 | 1 | 1  | 1.000E0 | 2.893E7 | 100   |   |
| Mitochondrial ribonuclease P protein 1 OS=Mus musculus GN=Trmt10c PE=2 SV=2 - [MRRP1_MOUSE]                       | 5.56  | 1 | 1 | 1 | 1  | 1.000E0 | 2.739E7 | 100   |   |
| DNA-directed RNA polymerase II subunit RPB4 OS=Mus musculus GN=Polr2d PE=2 SV=2 - [RPB4_MOUSE]                    | 17.61 | 1 | 1 | 1 | 2  | 1.000E0 | 2.558E7 | 100   |   |
| Upstream-binding protein 1 OS=Mus musculus GN=Ubp1 PE=1 SV=1 - [UBIP1_MOUSE]                                      | 5.19  | 1 | 2 | 2 | 2  | 1.000E0 | 2.550E7 | 100   |   |
| mRNA turnover protein 4 homolog OS=Mus musculus GN=Mrt4 PE=2 SV=1 - [MRT4_MOUSE]                                  | 6.28  | 1 | 1 | 1 | 1  | 1.000E0 | 2.407E7 | 100   |   |
| Eukaryotic translation initiation factor 4E type 2 OS=Mus musculus GN=Eif4e2 PE=1 SV=1 - [IF4E2_MOUSE]            | 8.98  | 1 | 1 | 1 | 1  | 1.000E0 | 2.372E7 | 100   |   |
| Centrin-2 OS=Mus musculus GN=Cetrn2 PE=1 SV=1 - [CETN2_MOUSE]                                                     | 7.56  | 1 | 1 | 1 | 1  | 1.000E0 | 1.770E7 | 100   |   |
| Chromatin modification-related protein MEAF6 OS=Mus musculus GN=Meaf6 PE=2 SV=1 - [EAF6_MOUSE]                    | 6.81  | 1 | 1 | 1 | 1  | 1.000E0 | 1.730E7 | 100   |   |
| 26S proteasome non-ATPase regulatory subunit 14 OS=Mus musculus GN=Psm14 PE=1 SV=2 - [PSDE_MOUSE]                 | 10.97 | 1 | 1 | 1 | 1  | 1.000E0 | 1.556E7 | 100   |   |
| RNA-binding protein 7 OS=Mus musculus GN=Rbm7 PE=1 SV=1 - [RBM7_MOUSE]                                            | 6.79  | 1 | 1 | 1 | 2  | 1.000E0 | 1.507E7 | 100   |   |
| Homeobox protein Meis1 OS=Mus musculus GN=Meis1 PE=1 SV=1 - [MEIS1_MOUSE]                                         | 6.15  | 2 | 1 | 1 | 2  | 1.000E0 | 1.404E7 | 100   |   |
| Surfeit locus protein 4 OS=Mus musculus GN=Surf4 PE=2 SV=1 - [SURF4_MOUSE]                                        | 6.69  | 1 | 1 | 1 | 2  | 1.000E0 | 1.369E7 | 100   |   |
| 28S ribosomal protein S6, mitochondrial OS=Mus musculus GN=Mrps6 PE=2 SV=3 - [RT06_MOUSE]                         | 8.00  | 1 | 1 | 1 | 1  | 1.000E0 | 1.271E7 | 100   |   |
| Copine-1 OS=Mus musculus GN=Cpne1 PE=1 SV=1 - [CPNE1_MOUSE]                                                       | 5.41  | 1 | 2 | 2 | 3  | 1.000E0 | 1.222E7 | 100   |   |
| Nucleolar protein 16 OS=Mus musculus GN=Nop16 PE=2 SV=1 - [NOP16_MOUSE]                                           | 8.99  | 1 | 1 | 1 | 1  | 1.000E0 | 8.285E6 | 100   |   |
| Ig kappa chain V-V region MOPC 149 OS=Mus musculus PE=1 SV=1 - [KV5A4_MOUSE]                                      | 12.04 | 1 | 1 | 1 | 1  | 1.000E0 | 7.270E6 | 100   |   |
| Protein SEC13 homolog OS=Mus musculus GN=Sec13 PE=2 SV=3 - [SEC13_MOUSE]                                          | 8.07  | 1 | 1 | 1 | 2  | 1.000E0 | 7.123E6 | 100   |   |
| Cyclin-dependent kinase 2-associated protein 1 OS=Mus musculus GN=Cdk2ap1 PE=1 SV=2 - [CDKA1_MOUSE]               | 11.40 | 1 | 1 | 1 | 1  | 1.000E0 | 3.253E6 | 100   |   |

Contaminant

PRC1 component
